# Supplementary material for: Microfluidic platforms for biomarker analysis
Source: Royal Society of Chemistry journal article supplement (doi:10.1039/c3lc51124c), 2014-01-01
Supplement: c3lc51124c.pdf [file c3lc51124c.pdf]

## SUPPLEMENTARY

**Table S1.** Conventional methods used for analysis of biomarkers

| Molecular category | Analytical process     | Conventional methods                                                                                                                                         | References |
|--------------------|------------------------|--------------------------------------------------------------------------------------------------------------------------------------------------------------|------------|
| Proteins           | Pre-concentration      | Sample stacking; ITP; FAI; SPE; mPC; EE; SLM; Immunoaffinity; Hollow fibres; MIP                                                                             | [1]        |
|                    | Detection              | Immunoassays (ELISA); MS; Chromatography; Electrophoresis (PAGE, Western blot); Photometry; Electrochemistry; Cytometry                                      | [2-5]      |
|                    | Quantification         | Immunoassays (ELISA); MS; Electrophoresis (PAGE, Western blot); Photometry (Ultraviolet absorbance, Colourimetry); Refractometry; Densitometry; Turbidimetry | [3, 4]     |
| DNA                | Amplification          | PCR                                                                                                                                                          | [4]        |
|                    | Detection              | MS; Photometry (absorption & fluorescence spectroscopy); Electrophoresis (Southern blot); Cytometry (FISH); Microarrays                                      | [4, 6]     |
|                    | Quantification         | Photometry (absorption & fluorescence spectroscopy); Densitometry; qPCR; Cytometry (FISH); Electrophoresis (Southern blot)                                   | [4, 7, 8]  |
|                    | Sequence determination | Sanger sequencing; Next-generation sequencing                                                                                                                | [9]        |
| RNA                | Amplification          | PCR                                                                                                                                                          | [4]        |
|                    | Detection              | Microarrays; MS; Electrophoresis (Northern blot); Photometry (absorption & fluorescence spectroscopy);                                                       | [4, 6]     |

|              |                        |                                                                                                                                                                           |             |
|--------------|------------------------|---------------------------------------------------------------------------------------------------------------------------------------------------------------------------|-------------|
|              | Quantification         | Electrophoresis (Northern blot); Densitometry; qPCR; RPA; RT-PCR; Photometry (absorption & fluorescence spectroscopy); Cytometry (FISH)                                   | [4, 8, 10]  |
|              | Sequence determination | RNA-seq (massively parallel cDNA sequencing); Microarrays                                                                                                                 | [11]        |
| Carbohydrate | Detection              | MS; Chromatography (HPLC); Microarrays; Electrochemistry; Photometry; Immunoassays                                                                                        | [4, 12, 13] |
|              | Characterisation       | MS; Chromatography (HPLC)                                                                                                                                                 | [12]        |
| Lipid        | Detection              | MS; Chromatography (HPLC, TLC); Immunoassays                                                                                                                              | [4, 14, 15] |
|              | Quantification         | MS; Chromatography (HPLC, TLC); Photometry; Densitometry                                                                                                                  | [4, 14, 15] |
| Metabolites  | Detection              | MS; NMR spectroscopy; Chromatography (LC, GC); Photometry (Ultraviolet absorbance, Infrared spectroscopy); Electrochemistry; Densitometry; Immunoassays; Electrochemistry | [4, 16]     |
|              | Quantification         | MS; NMR spectroscopy; Chromatography (LC, GC); Photometry (Ultraviolet absorbance, Infrared spectroscopy)                                                                 | [16, 17]    |

Abbreviations: ITP: Isotachopheresis; FAI: Field amplified injection SPE: Solid phase extraction; mPC: Membrane pre-concentration; EE: Electro-extraction; SLM: Supported liquid membranes; MIP: Molecularly imprinted polymer; ELISA: Enzyme-linked immunosorbent assay MS: Mass spectrometry; PAGE: Polyacrylamide gel electrophoresis; PCR: Polymerase chain reaction; FISH: Fluorescence in situ hybridisation; qPCR: Real-time quantitative polymerase chain reaction; RPA: RNase

protection assays; RT-PCR: Reverse transcription polymerase chain reaction; HPLC: High performance liquid chromatography; TLC: Thin layer chromatography; NMR: Nuclear magnetic resonance; LC: Liquid chromatography; GC: Gas chromatography.

## SUPPLEMENTARY REFERENCES

- [1] T. Stroink, E. Paarlberg, J. C. Waterval, A. Bult, and W. J. Underberg, "On-line sample preconcentration in capillary electrophoresis, focused on the determination of proteins and peptides: a review," *Electrophoresis*, vol. 21, pp. 2374-2383, 2001.
- [2] R. Westermeier and R. Marouga, "Protein detection methods in proteomics research," *Bioscience Reports*, vol. 25, pp. 19-32, 2005/02/01 2005.
- [3] P. Wu, D. G. Castner, and D. W. Grainger, "Diagnostic devices as biomaterials: a review of nucleic acid and protein microarray surface performance issues," *Journal of Biomaterials Science - Polymer Edition*, vol. 19, pp. 725-753, 2008.
- [4] P. F. Dupont, "Introduction to common laboratory assays and technology," in *Basic skills in interpreting laboratory data*, 4 ed: American Society of Health System Pharmacists, 2009, pp. 17-38.
- [5] M. Vestergaard, K. Kerman, and E. Tamiya, "An overview of label-free electrochemical protein sensors," *Sensors*, vol. 7, pp. 3442-3458, 2007.
- [6] I. Tsarfati-BarAd and L. Gheber, "Recent and future developments of microarrays: miniaturization and lab-on-chip approaches," in *Microarrays in diagnostics and biomarker development*, B. Jordan, Ed., ed: Springer Berlin Heidelberg, 2012, pp. 153-168.
- [7] J. Hoebeek, F. Speleman, and J. Vandesompele, "Real-time quantitative PCR as an alternative to Southern blot or fluorescence in situ hybridization for detection of gene copy number changes," in *Protocols for Nucleic Acid Analysis by Nonradioactive Probes*, ed: Springer, 2007, pp. 205-226.
- [8] D. G. Ginzinger, "Gene quantification using real-time quantitative PCR: an emerging technology hits the mainstream," *Experimental Hematology*, vol. 30, pp. 503-512, 2002.
- [9] M. L. Metzker, "Sequencing technologies—the next generation," *Nature Reviews Genetics*, vol. 11, pp. 31-46, 2009.
- [10] S. A. Bustin, "Absolute quantification of mRNA using real-time reverse transcription polymerase chain reaction assays," *Journal of Molecular Endocrinology*, vol. 25, pp. 169-193, 2000.
- [11] F. Ozsolak and P. M. Milos, "RNA sequencing: advances, challenges and opportunities," *Nature Reviews Genetics*, vol. 12, pp. 87-98, 2010.
- [12] M. Jankovic, "Glycans as biomarkers: status and perspectives," *Journal of Medical Biochemistry*, vol. 30, pp. 213-223, 2011.
- [13] J. Wang, "Electrochemical glucose biosensors," *Chemical Reviews*, vol. 108, pp. 814-825, 2008.
- [14] P. Meikle, C. Barlow, and J. Weir, "Lipidomics and lipid biomarker discovery," *Australian Biochemistry*, vol. 40, pp. 12-16, 2009.
- [15] L. Chamorro, A. García-Cano, R. Busto, J. Martínez-González, A. Albillos, M. Á. Lasunción, *et al.*, "Quantitative profile of lipid classes in blood by normal phase chromatography with evaporative light scattering detector:

- Application in the detection of lipid class abnormalities in liver cirrhosis,"  
*Clinica Chimica Acta*, vol. 421, pp. 132-139, 6/5/ 2013.
- [16] Y. S. Kim, P. Maruvada, and J. A. Milner, "Metabolomics in biomarker discovery: future uses for cancer prevention," vol. 4, pp. 93-102, 2008.
- [17] W. B. Dunn and D. I. Ellis, "Metabolomics: Current analytical platforms and methodologies," *TrAC Trends in Analytical Chemistry*, vol. 24, pp. 285-294, 4// 2005.
